# Supplementary material for: Synthesis and nonlinear optical properties of new gallium thiophosphate Rb2Ga2P2S9
Source: Royal Society of Chemistry journal article supplement (doi:10.1039/c9nj02365h), 2019-01-01
Supplement: c9nj02365h1.pdf [file c9nj02365h1.pdf]

## Supporting Information

### Synthesis and Nonlinear Optical Properties of New Gallium Thiophosphate

#### $\text{Rb}_2\text{Ga}_2\text{P}_2\text{S}_9$

Qichang Hu,<sup>\*a</sup> Kaibin Ruan,<sup>a</sup> Yuzhu Wang,<sup>a</sup> Kai Ding <sup>\*b</sup> and Yong Xu <sup>a</sup>

<sup>a</sup>*College of Mechanical and Electronic Engineering, Fujian Agriculture and Forestry University, Fuzhou, Fujian, 350002, China*

<sup>b</sup>*Department of Electrical and Computer Engineering, Virginia Commonwealth University, 601 West Main Street, Richmond, VA 23284, USA*

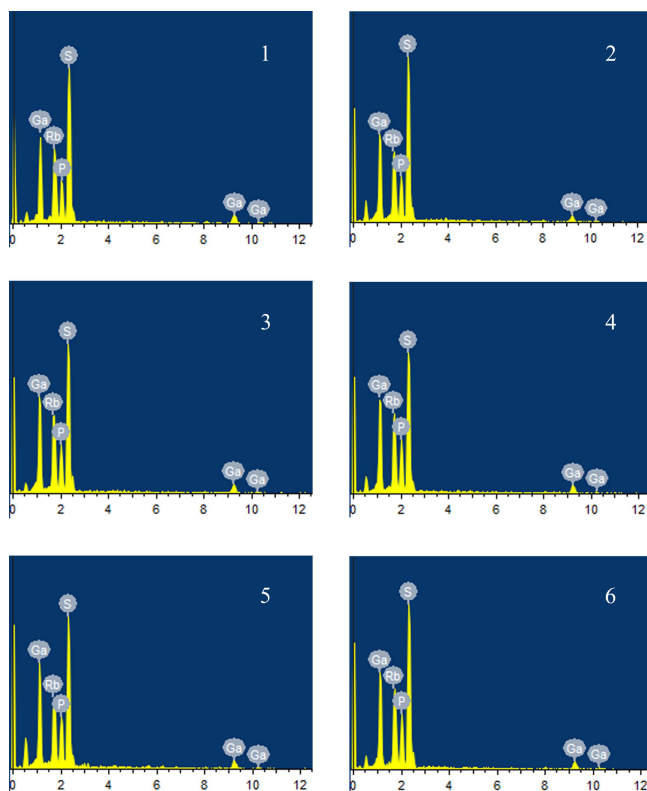

**Fig. S1.** EDX spectrum of 1.

**Table S1.** Atomic coordinates ( $\times 10^{-4}$ ) for **1**.

| atoms | x       | y       | z       |
|-------|---------|---------|---------|
| Rb(1) | 0       | 978(1)  | 6932(1) |
| Rb(2) | 0       | 6138(1) | 3484(1) |
| Ga(1) | 2421(1) | 2965(1) | 3898(1) |
| P(1)  | 0       | 3104(1) | 750(2)  |
| P(2)  | 0       | 577(1)  | 2700(2) |
| S(1)  | 2412(2) | 1017(1) | 3748(1) |
| S(2)  | 0       | 1320(1) | 718(2)  |
| S(3)  | 0       | 3584(1) | 5161(2) |
| S(4)  | 0       | 6493(2) | 0(2)    |
| S(5)  | 2414(2) | 3692(1) | 1678(1) |
| S(6)  | 0       | 3443(1) | 8765(2) |
| S(7)  | 0       | 8970(2) | 2259(2) |
